# Supplementary material
Source: publisher site journal article supplement (https://www.spandidos-publications.com/1516/downloadSupplementary)

Figure S1. Relative expression level of other potential target genes of *CTBP1-AS2* or miR-195-5p. Relative expression levels of (A) miR-330-5p, (B) miR-326, (C) miR-3176, (D) miR-556-5p, (E) miR-4537 and (F) miR-146a in the control and AS groups. The relative expression levels of (G) FASN, (H) CCNE1, (I) CASK, (J) BTRC, (K) ARL2 and (L) PLAG1 in control and AS groups. miRNA/miR, microRNA; AS, atherosclerosis; ns, not significant; FASN, fatty acid synthase; CCNE1, cyclin E1; CASK, calcium/calmodulin dependent serine protein kinase; BTRC, Beta-transducin repeat containing E3 ubiquitin protein ligase; ARL2, ADP ribosylation factor like GTPase 2; PLAG1, PLAG1 zinc finger.

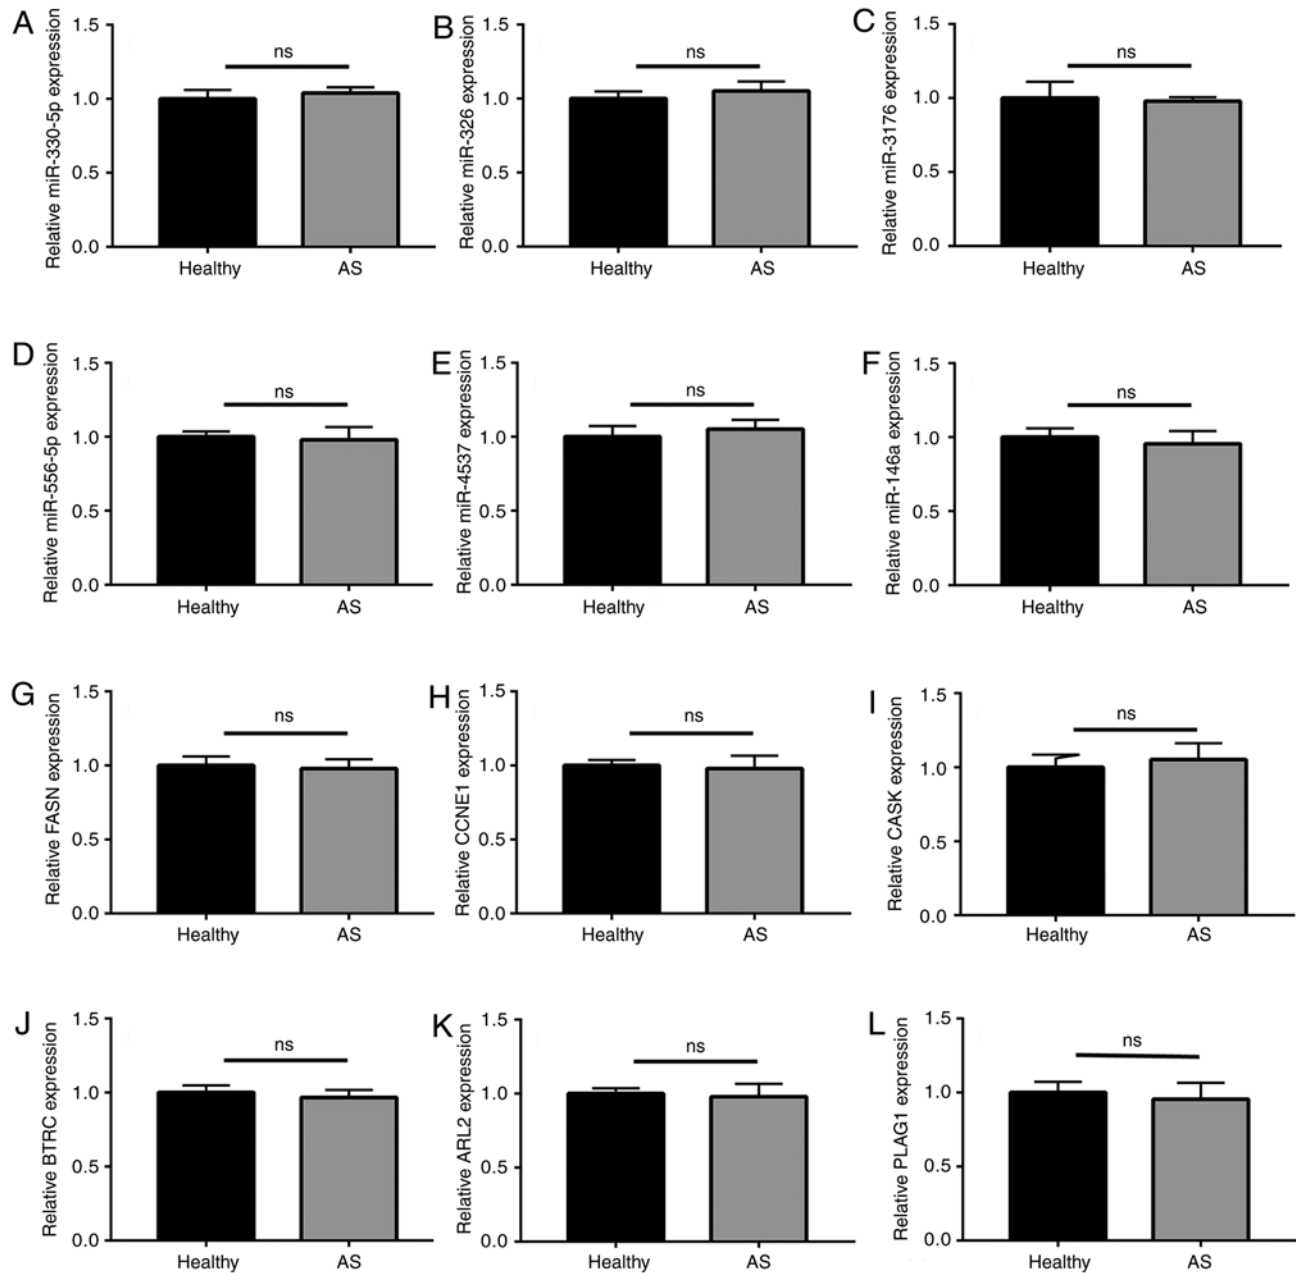

Supplement: Supplementary file 1 [file downloadSupplementary]
